# Supplementary material for: Triggering Faultline Effects in Teams: The Importance of Bridging Friendship Ties and Breaching Animosity Ties
Source: Atypon-hosted journal article supplement (doi:10.1287/orsc.2014.0944), 2014-11-19
Supplement: orsc.2014.0944-sm.pdf [file orsc.2014.0944-sm.pdf]

## Appendix A

Examples of faultline scores for two teams

Team A015 (Faultline=0.70)

| Member | Task meaningfulness<br>(Separation) | Professional level<br>(Disparity) | Cultural background<br>(Variety) |
|--------|-------------------------------------|-----------------------------------|----------------------------------|
| 1      | 5                                   | Professor                         | Caucasian                        |
| 2      | 5                                   | Masters                           | Caucasian                        |
| 3      | 4.667                               | Masters                           | Caucasian                        |
| 4      | 4.333                               | Post doc                          | Asian                            |

Team E031 (Faultline=0.44)

| Member | Task meaningfulness<br>(Separation) | Professional level<br>(Disparity) | Cultural background<br>(Variety) |
|--------|-------------------------------------|-----------------------------------|----------------------------------|
| 1      | 5                                   | Professor                         | Caucasian                        |
| 2      | 5                                   | Post doc                          | Asian                            |
| 3      | 4.667                               | Doctoral student                  | European                         |
| 4      | 5                                   | Doctoral student                  | Latino                           |

Faultline Calculation Demonstration (Team A015)  
(Formula developed by Thatcher, Jehn, & Zanutto, 2003)

Raw data

| Member | Task meaningfulness (TM)<br>(Separation) | Professional level (PL)<br>(Disparity) | Cultural background (CB)<br>(Variety) |
|--------|------------------------------------------|----------------------------------------|---------------------------------------|
| 1      | 5                                        | Professor                              | Caucasian                             |
| 2      | 5                                        | Masters                                | Caucasian                             |
| 3      | 4.667                                    | Masters                                | Caucasian                             |
| 4      | 4.333                                    | Post doc                               | Asian                                 |

Raw data with dummy variables

| Member | TM    | PL1   | PL2   | PL3   | PL4   | PL5   | PL6   | CB1   | CB2   | CB3   | CB4   | CB5   | CB6   | CB7   | CB8   | CB9   | CB10  | CB11  |
|--------|-------|-------|-------|-------|-------|-------|-------|-------|-------|-------|-------|-------|-------|-------|-------|-------|-------|-------|
| 1      | 5     | 0.000 | 0.000 | 0.000 | 0.000 | 0.000 | 1.000 | 0.000 | 1.000 | 0.000 | 0.000 | 0.000 | 0.000 | 0.000 | 0.000 | 0.000 | 0.000 | 0.000 |
| 2      | 5     | 0.000 | 0.000 | 1.000 | 0.000 | 0.000 | 0.000 | 0.000 | 1.000 | 0.000 | 0.000 | 0.000 | 0.000 | 0.000 | 0.000 | 0.000 | 0.000 | 0.000 |
| 3      | 4.667 | 0.000 | 0.000 | 1.000 | 0.000 | 0.000 | 0.000 | 0.000 | 1.000 | 0.000 | 0.000 | 0.000 | 0.000 | 0.000 | 0.000 | 0.000 | 0.000 | 0.000 |
| 4      | 4.333 | 0.000 | 0.000 | 0.000 | 0.000 | 1.000 | 0.000 | 0.000 | 0.000 | 0.000 | 0.000 | 0.000 | 0.000 | 1.000 | 0.000 | 0.000 | 0.000 | 0.000 |

| Rescaling factor | TM | PL1   | PL2   | PL3   | PL4   | PL5   | PL6   | CB1   | CB2   | CB3   | CB4   | CB5   | CB6   | CB7   | CB8   | CB9   | CB10  | CB11  |
|------------------|----|-------|-------|-------|-------|-------|-------|-------|-------|-------|-------|-------|-------|-------|-------|-------|-------|-------|
| 1                | *  | 0.707 | 0.707 | 0.707 | 0.707 | 0.707 | 0.707 | 0.707 | 0.707 | 0.707 | 0.707 | 0.707 | 0.707 | 0.707 | 0.707 | 0.707 | 0.707 | 0.707 |

\*: task meaningfulness is standardized based on the sample mean and standard deviation for all teams.

| Member               | TM           | PL1          | PL2          | PL3          | PL4          | PL5          | PL6          | CB1          | CB2          | CB3          | CB4          | CB5          | CB6          | CB7          | CB8          | CB9          | CB10         | CB11 |
|----------------------|--------------|--------------|--------------|--------------|--------------|--------------|--------------|--------------|--------------|--------------|--------------|--------------|--------------|--------------|--------------|--------------|--------------|------|
| 1                    | 0.703        | 0.000        | 0.000        | 0.000        | 0.000        | 0.000        | 0.707        | 0.000        | 0.707        | 0.000        | 0.000        | 0.000        | 0.000        | 0.000        | 0.000        | 0.000        | 0.000        |      |
| 2                    | 0.703        | 0.000        | 0.000        | 0.707        | 0.000        | 0.000        | 0.000        | 0.000        | 0.707        | 0.000        | 0.000        | 0.000        | 0.000        | 0.000        | 0.000        | 0.000        | 0.000        |      |
| 3                    | 0.127        | 0.000        | 0.000        | 0.707        | 0.000        | 0.000        | 0.000        | 0.000        | 0.707        | 0.000        | 0.000        | 0.000        | 0.000        | 0.000        | 0.000        | 0.000        | 0.000        |      |
| 4                    | -0.448       | 0.000        | 0.000        | 0.000        | 0.000        | 0.707        | 0.000        | 0.000        | 0.000        | 0.000        | 0.000        | 0.000        | 0.000        | 0.707        | 0.000        | 0.000        | 0.000        |      |
| <b>Rescaled mean</b> | <b>0.271</b> | <b>0.000</b> | <b>0.000</b> | <b>0.354</b> | <b>0.000</b> | <b>0.177</b> | <b>0.177</b> | <b>0.000</b> | <b>0.530</b> | <b>0.000</b> | <b>0.000</b> | <b>0.000</b> | <b>0.000</b> | <b>0.177</b> | <b>0.000</b> | <b>0.000</b> | <b>0.000</b> |      |

Total sum of squares (denominator for faultline calculation) is 2.911.

A group with  $n$  members can potentially be split into two subgroups in  $S = (2^{n-1} - 1)$  ways. The ratio of the sum of squares between the subgroups and the total sum of squares will be computed for each possible split:

| Subgroup Characteristic Averages for split #1             |        |    |       |       |       |       |       |       |                              |       |       |       |       |       |       |       |       |       |       |       |  |
|-----------------------------------------------------------|--------|----|-------|-------|-------|-------|-------|-------|------------------------------|-------|-------|-------|-------|-------|-------|-------|-------|-------|-------|-------|--|
| Split 1(g=1)                                              | Member | ng | TM    | PL1   | PL2   | PL3   | PL4   | PL5   | PL6                          | CB1   | CB2   | CB3   | CB4   | CB5   | CB6   | CB7   | CB8   | CB9   | CB10  | CB11  |  |
| Subgroup 1                                                | 1      | 1  | 0.703 | 0.000 | 0.000 | 0.000 | 0.000 | 0.000 | 0.707                        | 0.000 | 0.707 | 0.000 | 0.000 | 0.000 | 0.000 | 0.000 | 0.000 | 0.000 | 0.000 | 0.000 |  |
| Subgroup 2                                                | 2,3,4  | 3  | 0.127 | 0.000 | 0.000 | 0.471 | 0.000 | 0.236 | 0.000                        | 0.000 | 0.471 | 0.000 | 0.000 | 0.000 | 0.000 | 0.236 | 0.000 | 0.000 | 0.000 | 0.000 |  |
| Between Group Sum of Squares for Characteristics split #1 |        |    |       |       |       |       |       |       |                              |       |       |       |       |       |       |       |       |       |       |       |  |
| Subgroup 1                                                | 1      | 1  | 0.186 | 0.000 | 0.000 | 0.125 | 0.000 | 0.031 | 0.281                        | 0.000 | 0.031 | 0.000 | 0.000 | 0.000 | 0.000 | 0.031 | 0.000 | 0.000 | 0.000 | 0.000 |  |
| Subgroup 2                                                | 2,3,4  | 3  | 0.062 | 0.000 | 0.000 | 0.042 | 0.000 | 0.010 | 0.094                        | 0.000 | 0.010 | 0.000 | 0.000 | 0.000 | 0.000 | 0.010 | 0.000 | 0.000 | 0.000 | 0.000 |  |
| Summary for split #1                                      |        |    |       |       |       |       |       |       |                              |       |       |       |       |       |       |       |       |       |       |       |  |
| Total between group sum of squares                        |        |    |       |       |       |       |       | 0.915 | <b>Faultine for split #1</b> |       |       |       |       |       |       | 0.31  |       |       |       |       |  |

| Subgroup Characteristic Averages for split #2             |        |    |       |       |       |       |       |       |                              |       |       |       |       |       |       |       |       |       |       |       |  |
|-----------------------------------------------------------|--------|----|-------|-------|-------|-------|-------|-------|------------------------------|-------|-------|-------|-------|-------|-------|-------|-------|-------|-------|-------|--|
| Split 2(g=2)                                              | Member | ng | TM    | PL1   | PL2   | PL3   | PL4   | PL5   | PL6                          | CB1   | CB2   | CB3   | CB4   | CB5   | CB6   | CB7   | CB8   | CB9   | CB10  | CB11  |  |
| Subgroup 1                                                | 2      | 1  | 0.703 | 0.000 | 0.000 | 0.707 | 0.000 | 0.000 | 0.000                        | 0.000 | 0.707 | 0.000 | 0.000 | 0.000 | 0.000 | 0.000 | 0.000 | 0.000 | 0.000 | 0.000 |  |
| Subgroup 2                                                | 1,3,4  | 3  | 0.127 | 0.000 | 0.000 | 0.236 | 0.000 | 0.236 | 0.236                        | 0.000 | 0.471 | 0.000 | 0.000 | 0.000 | 0.000 | 0.236 | 0.000 | 0.000 | 0.000 | 0.000 |  |
| Between Group Sum of Squares for Characteristics split #2 |        |    |       |       |       |       |       |       |                              |       |       |       |       |       |       |       |       |       |       |       |  |
| Subgroup 1                                                | 2      | 1  | 0.186 | 0.000 | 0.000 | 0.125 | 0.000 | 0.031 | 0.031                        | 0.000 | 0.031 | 0.000 | 0.000 | 0.000 | 0.000 | 0.031 | 0.000 | 0.000 | 0.000 | 0.000 |  |
| Subgroup 2                                                | 1,3,4  | 3  | 0.062 | 0.000 | 0.000 | 0.042 | 0.000 | 0.010 | 0.010                        | 0.000 | 0.010 | 0.000 | 0.000 | 0.000 | 0.000 | 0.010 | 0.000 | 0.000 | 0.000 | 0.000 |  |
| Summary for split #2                                      |        |    |       |       |       |       |       |       |                              |       |       |       |       |       |       |       |       |       |       |       |  |
| Total between group sum of squares                        |        |    |       |       |       |       |       | 0.582 | <b>Faultine for split #2</b> |       |       |       |       |       |       | 0.20  |       |       |       |       |  |

| Subgroup Characteristic Averages for split #3             |        |    |       |       |       |       |       |       |       |       |       |       |       |                              |       |       |       |       |       |       |
|-----------------------------------------------------------|--------|----|-------|-------|-------|-------|-------|-------|-------|-------|-------|-------|-------|------------------------------|-------|-------|-------|-------|-------|-------|
| Split 3(g=3)                                              | Member | ng | TM    | PL1   | PL2   | PL3   | PL4   | PL5   | PL6   | CB1   | CB2   | CB3   | CB4   | CB5                          | CB6   | CB7   | CB8   | CB9   | CB10  | CB11  |
| Subgroup 1                                                | 3      | 1  | 0.127 | 0.000 | 0.000 | 0.707 | 0.000 | 0.000 | 0.000 | 0.000 | 0.707 | 0.000 | 0.000 | 0.000                        | 0.000 | 0.000 | 0.000 | 0.000 | 0.000 | 0.000 |
| Subgroup 2                                                | 1,2,4  | 3  | 0.319 | 0.000 | 0.000 | 0.236 | 0.000 | 0.236 | 0.236 | 0.000 | 0.471 | 0.000 | 0.000 | 0.000                        | 0.000 | 0.236 | 0.000 | 0.000 | 0.000 | 0.000 |
| Between Group Sum of Squares for Characteristics split #3 |        |    |       |       |       |       |       |       |       |       |       |       |       |                              |       |       |       |       |       |       |
| Subgroup 1                                                | 3      | 1  | 0.021 | 0.000 | 0.000 | 0.125 | 0.000 | 0.031 | 0.031 | 0.000 | 0.031 | 0.000 | 0.000 | 0.000                        | 0.000 | 0.031 | 0.000 | 0.000 | 0.000 | 0.000 |
| Subgroup 2                                                | 1,2,4  | 3  | 0.007 | 0.000 | 0.000 | 0.042 | 0.000 | 0.010 | 0.010 | 0.000 | 0.010 | 0.000 | 0.000 | 0.000                        | 0.000 | 0.010 | 0.000 | 0.000 | 0.000 | 0.000 |
| Summary for split #3                                      |        |    |       |       |       |       |       |       |       |       |       |       |       |                              |       |       |       |       |       |       |
| Total between group sum of squares                        |        |    |       |       |       |       |       | 0.361 |       |       |       |       |       | <b>Faultine for split #3</b> |       |       |       | 0.12  |       |       |

| Subgroup Characteristic Averages for split #4             |        |    |        |       |       |       |       |       |       |       |       |       |       |                              |       |       |       |             |       |       |
|-----------------------------------------------------------|--------|----|--------|-------|-------|-------|-------|-------|-------|-------|-------|-------|-------|------------------------------|-------|-------|-------|-------------|-------|-------|
| Split 4(g=4)                                              | Member | ng | TM     | PL1   | PL2   | PL3   | PL4   | PL5   | PL6   | CB1   | CB2   | CB3   | CB4   | CB5                          | CB6   | CB7   | CB8   | CB9         | CB10  | CB11  |
| Subgroup 1                                                | 4      | 1  | -0.448 | 0.000 | 0.000 | 0.000 | 0.000 | 0.707 | 0.000 | 0.000 | 0.000 | 0.000 | 0.000 | 0.000                        | 0.000 | 0.707 | 0.000 | 0.000       | 0.000 | 0.000 |
| Subgroup 2                                                | 1,2,3  | 3  | 0.511  | 0.000 | 0.000 | 0.471 | 0.000 | 0.000 | 0.236 | 0.000 | 0.707 | 0.000 | 0.000 | 0.000                        | 0.000 | 0.000 | 0.000 | 0.000       | 0.000 | 0.000 |
| Between Group Sum of Squares for Characteristics split #4 |        |    |        |       |       |       |       |       |       |       |       |       |       |                              |       |       |       |             |       |       |
| Subgroup 1                                                | 4      | 1  | 0.518  | 0.000 | 0.000 | 0.125 | 0.000 | 0.281 | 0.031 | 0.000 | 0.281 | 0.000 | 0.000 | 0.000                        | 0.000 | 0.281 | 0.000 | 0.000       | 0.000 | 0.000 |
| Subgroup 2                                                | 1,2,3  | 3  | 0.173  | 0.000 | 0.000 | 0.042 | 0.000 | 0.094 | 0.010 | 0.000 | 0.094 | 0.000 | 0.000 | 0.000                        | 0.000 | 0.094 | 0.000 | 0.000       | 0.000 | 0.000 |
| Summary for split #4                                      |        |    |        |       |       |       |       |       |       |       |       |       |       |                              |       |       |       |             |       |       |
| Total between group sum of squares                        |        |    |        |       |       |       |       | 2.023 |       |       |       |       |       | <b>Faultine for split #4</b> |       |       |       | <b>0.70</b> |       |       |

| Subgroup Characteristic Averages for split #5             |        |    |        |       |       |       |       |       |       |       |       |       |       |       |       |       |       |       |                              |       |  |
|-----------------------------------------------------------|--------|----|--------|-------|-------|-------|-------|-------|-------|-------|-------|-------|-------|-------|-------|-------|-------|-------|------------------------------|-------|--|
| Split 5(g=5)                                              | Member | ng | TM     | PL1   | PL2   | PL3   | PL4   | PL5   | PL6   | CB1   | CB2   | CB3   | CB4   | CB5   | CB6   | CB7   | CB8   | CB9   | CB10                         | CB11  |  |
| Subgroup 1                                                | 1, 2   | 2  | 0.703  | 0.000 | 0.000 | 0.354 | 0.000 | 0.000 | 0.354 | 0.000 | 0.707 | 0.000 | 0.000 | 0.000 | 0.000 | 0.000 | 0.000 | 0.000 | 0.000                        | 0.000 |  |
| Subgroup 2                                                | 3,4    | 2  | -0.160 | 0.000 | 0.000 | 0.354 | 0.000 | 0.354 | 0.000 | 0.000 | 0.354 | 0.000 | 0.000 | 0.000 | 0.000 | 0.354 | 0.000 | 0.000 | 0.000                        | 0.000 |  |
| Between Group Sum of Squares for Characteristics split #5 |        |    |        |       |       |       |       |       |       |       |       |       |       |       |       |       |       |       |                              |       |  |
| Subgroup 1                                                | 1, 2   | 2  | 0.373  | 0.000 | 0.000 | 0.000 | 0.000 | 0.063 | 0.063 | 0.000 | 0.063 | 0.000 | 0.000 | 0.000 | 0.000 | 0.063 | 0.000 | 0.000 | 0.000                        | 0.000 |  |
| Subgroup 2                                                | 3,4    | 2  | 0.373  | 0.000 | 0.000 | 0.000 | 0.000 | 0.063 | 0.063 | 0.000 | 0.063 | 0.000 | 0.000 | 0.000 | 0.000 | 0.063 | 0.000 | 0.000 | 0.000                        | 0.000 |  |
| Summary for split #5                                      |        |    |        |       |       |       |       |       |       |       |       |       |       |       |       |       |       |       |                              |       |  |
| Total between group sum of squares                        |        |    |        |       |       |       |       | 1.245 |       |       |       |       |       |       |       |       |       |       | <b>Faultine for split #5</b> | 0.43  |  |

| Subgroup Characteristic Averages for split #6             |        |    |       |       |       |       |       |       |       |       |       |       |       |       |       |       |       |       |       |                              |      |
|-----------------------------------------------------------|--------|----|-------|-------|-------|-------|-------|-------|-------|-------|-------|-------|-------|-------|-------|-------|-------|-------|-------|------------------------------|------|
| Split 6(g=6)                                              | Member | ng | TM    | PL1   | PL2   | PL3   | PL4   | PL5   | PL6   | CB1   | CB2   | CB3   | CB4   | CB5   | CB6   | CB7   | CB8   | CB9   | CB10  | CB11                         |      |
| Subgroup 1                                                | 1,3    | 2  | 0.415 | 0.000 | 0.000 | 0.354 | 0.000 | 0.000 | 0.354 | 0.000 | 0.707 | 0.000 | 0.000 | 0.000 | 0.000 | 0.000 | 0.000 | 0.000 | 0.000 | 0.000                        |      |
| Subgroup 2                                                | 2,4    | 2  | 0.127 | 0.000 | 0.000 | 0.354 | 0.000 | 0.354 | 0.000 | 0.000 | 0.354 | 0.000 | 0.000 | 0.000 | 0.000 | 0.354 | 0.000 | 0.000 | 0.000 | 0.000                        |      |
| Between Group Sum of Squares for Characteristics split #6 |        |    |       |       |       |       |       |       |       |       |       |       |       |       |       |       |       |       |       |                              |      |
| Subgroup 1                                                | 1,3    | 2  | 0.041 | 0.000 | 0.000 | 0.000 | 0.000 | 0.063 | 0.063 | 0.000 | 0.063 | 0.000 | 0.000 | 0.000 | 0.000 | 0.063 | 0.000 | 0.000 | 0.000 | 0.000                        |      |
| Subgroup 2                                                | 2,4    | 2  | 0.041 | 0.000 | 0.000 | 0.000 | 0.000 | 0.063 | 0.063 | 0.000 | 0.063 | 0.000 | 0.000 | 0.000 | 0.000 | 0.063 | 0.000 | 0.000 | 0.000 | 0.000                        |      |
| Summary for split #6                                      |        |    |       |       |       |       |       |       |       |       |       |       |       |       |       |       |       |       |       |                              |      |
| Total between group sum of squares                        |        |    |       |       |       |       |       | 0.583 |       |       |       |       |       |       |       |       |       |       |       | <b>Faultine for split #6</b> | 0.20 |

| Subgroup Characteristic Averages for split #7             |        |    |       |       |       |       |       |       |       |       |       |       |       |                              |       |       |       |       |       |       |
|-----------------------------------------------------------|--------|----|-------|-------|-------|-------|-------|-------|-------|-------|-------|-------|-------|------------------------------|-------|-------|-------|-------|-------|-------|
| Split 7(g=7)                                              | Member | ng | TM    | PL1   | PL2   | PL3   | PL4   | PL5   | PL6   | CB1   | CB2   | CB3   | CB4   | CB5                          | CB6   | CB7   | CB8   | CB9   | CB10  | CB11  |
| Subgroup 1                                                | 1,4    | 2  | 0.127 | 0.000 | 0.000 | 0.000 | 0.000 | 0.354 | 0.354 | 0.000 | 0.354 | 0.000 | 0.000 | 0.000                        | 0.000 | 0.354 | 0.000 | 0.000 | 0.000 | 0.000 |
| Subgroup 2                                                | 2,3    | 2  | 0.415 | 0.000 | 0.000 | 0.707 | 0.000 | 0.000 | 0.000 | 0.000 | 0.707 | 0.000 | 0.000 | 0.000                        | 0.000 | 0.000 | 0.000 | 0.000 | 0.000 | 0.000 |
| Between Group Sum of Squares for Characteristics split #7 |        |    |       |       |       |       |       |       |       |       |       |       |       |                              |       |       |       |       |       |       |
| Subgroup 1                                                | 1,4    | 2  | 0.041 | 0.000 | 0.000 | 0.250 | 0.000 | 0.063 | 0.063 | 0.000 | 0.063 | 0.000 | 0.000 | 0.000                        | 0.000 | 0.063 | 0.000 | 0.000 | 0.000 | 0.000 |
| Subgroup 2                                                | 2,3    | 2  | 0.041 | 0.000 | 0.000 | 0.250 | 0.000 | 0.063 | 0.063 | 0.000 | 0.063 | 0.000 | 0.000 | 0.000                        | 0.000 | 0.063 | 0.000 | 0.000 | 0.000 | 0.000 |
| Summary for split #7                                      |        |    |       |       |       |       |       |       |       |       |       |       |       |                              |       |       |       |       |       |       |
| Total between group sum of squares                        |        |    |       |       |       |       |       | 1.083 |       |       |       |       |       | <b>Faultine for split #7</b> |       |       |       | 0.37  |       |       |

Hence, the faultline score for this team is the highest faultline score based on the strongest group split (split # 4) which is 0.70.
